# Supplementary material for: Modulation of initial movement for double potential targets with specific time constraints
Source: Research Square preprint supplement (doi:10.21203/rs.3.rs-460918/v1), 2021-04-26
Supplement: Supplementary file 1 [file ddeb783da37b662877cbb615.docx]

**Supplementary Information**

**Modulation of initial movement for double potential targets with specific time constraints**

Ryoji Onagawa 1,2,3) and Kazutoshi Kudo1)

1. Laboratory of Sports Sciences, Department of Life Sciences, Graduate School of Arts and Sciences, The University of Tokyo, Tokyo, Japan.
2. Research Fellow of Japan Society for the Promotion of Science, Tokyo, Japan.
3. Faculty of Science and Engineering, Waseda University, Tokyo, Japan

**Supplementary Figures**

The following figures show the trajectories of each participant depending on the combination of time constraints. For each participant, trajectories are drawn according to the 3×3 combination for time constraints, and the time constraints are indicated by indicators above the targets (Same classification as Fig. 2 in the main text).
